# Supplementary material for: SARS‐CoV‐2 receptor ACE2 and TMPRSS2 are primarily expressed in bronchial transient secretory cells
Source: PubMed Central journal article supplement (PMC7232010; doi:10.15252/embj.20105114), 2020-04-14

# Appendix

## Table of contents

1. Appendix Figure legends
2. Appendix Figures
  - a. Appendix Figure S1
  - b. Appendix Figure S2
  - c. Appendix Figure S3
  - d. Appendix Figure S4

## Appendix Figure legends

### **Appendix Figure S1 – Exemplary characterization of an air liquid interface (ALI) culture derived from HBECs.**

Filters of an ALI culture were stained for the indicated bronchial epithelial markers and analyzed using confocal microscopy. Scale bars, 50  $\mu\text{m}$  for all panels, except 'enlarged' top and side view panels, 20  $\mu\text{m}$ .

### **Appendix Figure S2 – Cell type identification by marker genes.**

DotPlots indicate the percent expressing cells (size) and expression level (color) for selected marker genes for each cell type in HBECs.

### **Appendix Figure S3 - single-cell sequencing quality control.**

A, B Number of unique molecular identifiers (UMIs, top row) per cell for each individual sample from lung tissue (A) and HBECs (B).

C, D Number of genes per cell for each individual sample from lung tissue (A) and HBECs (B).

E Percentage of mitochondrial reads in different cell types in the lung dataset.

### **Appendix Figure S4 – Expression of DPP4 in primary lung.**

A, B Expression levels (A) and percentage of positive cells (B) for *DPP4* in the lung dataset.

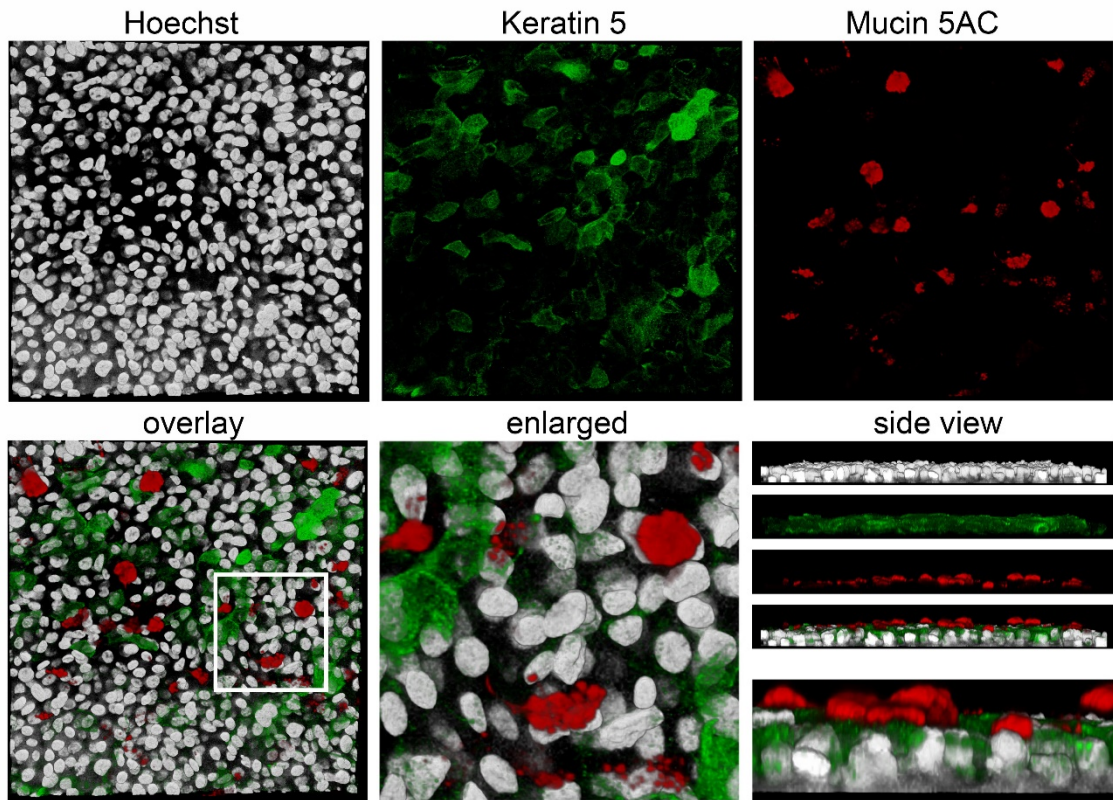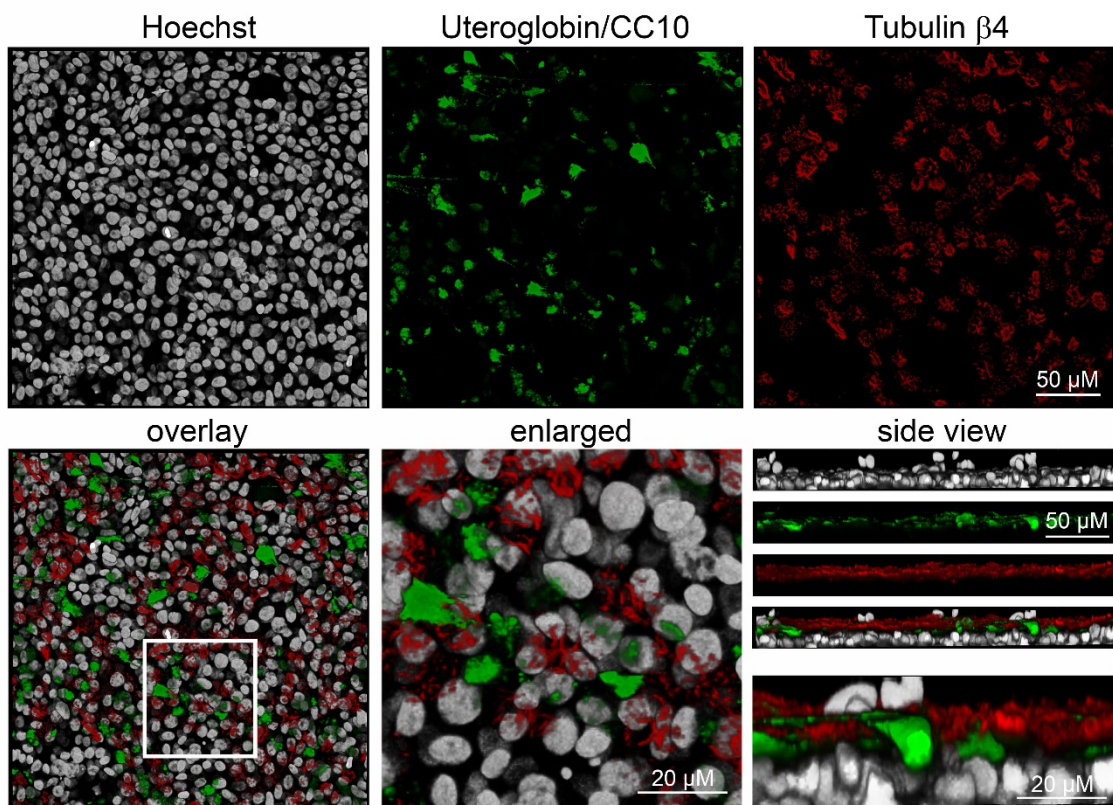

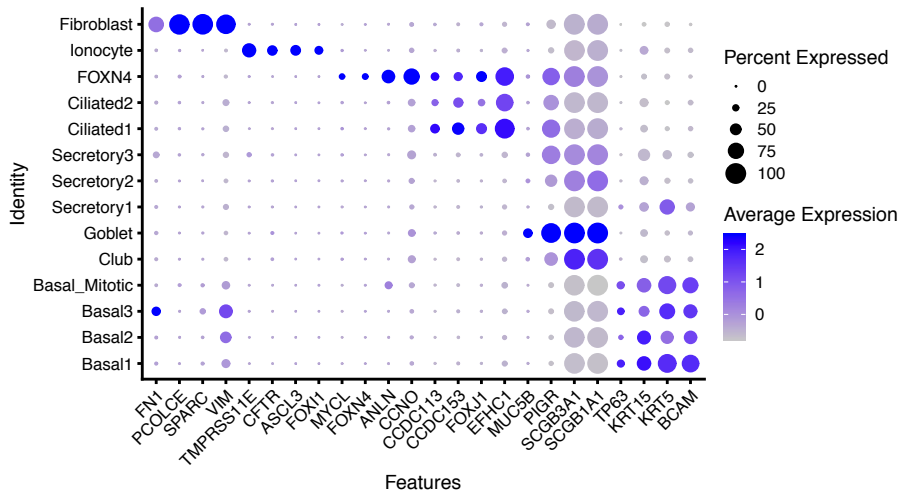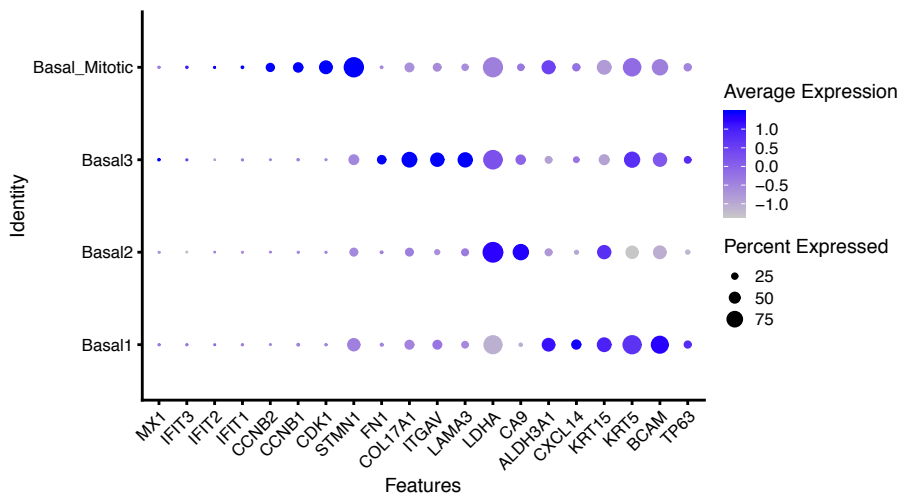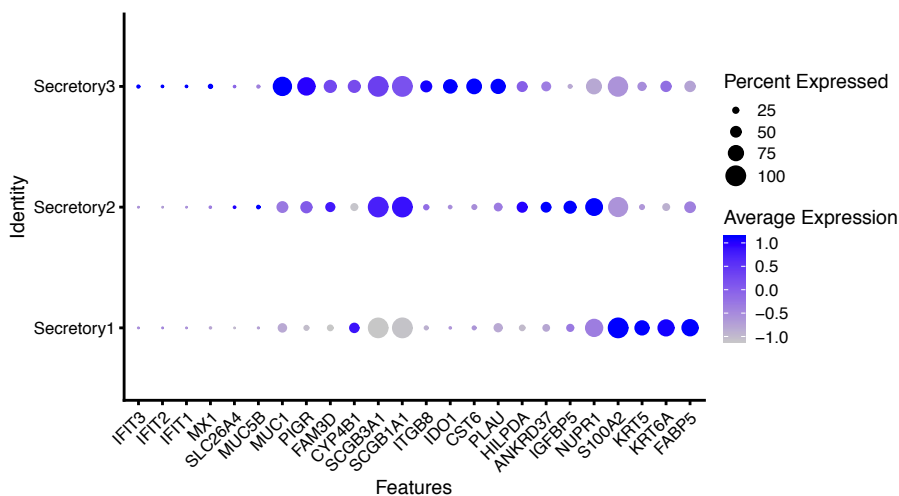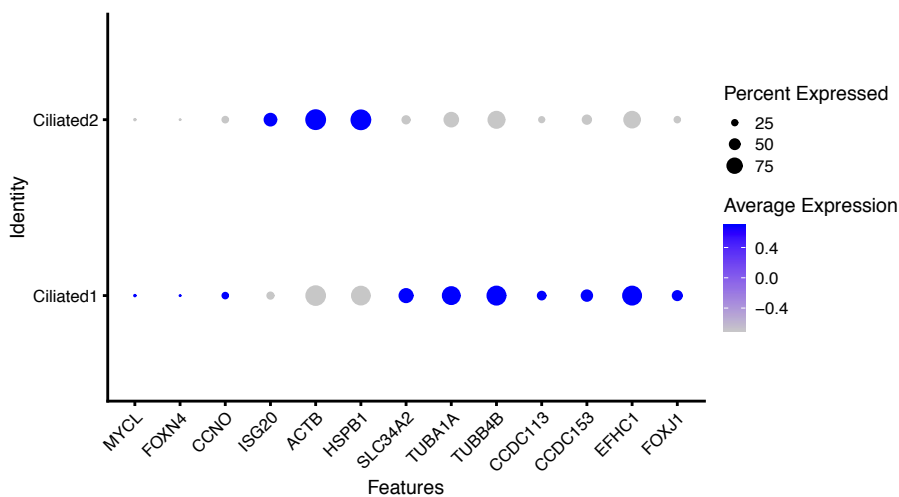

A

## lung

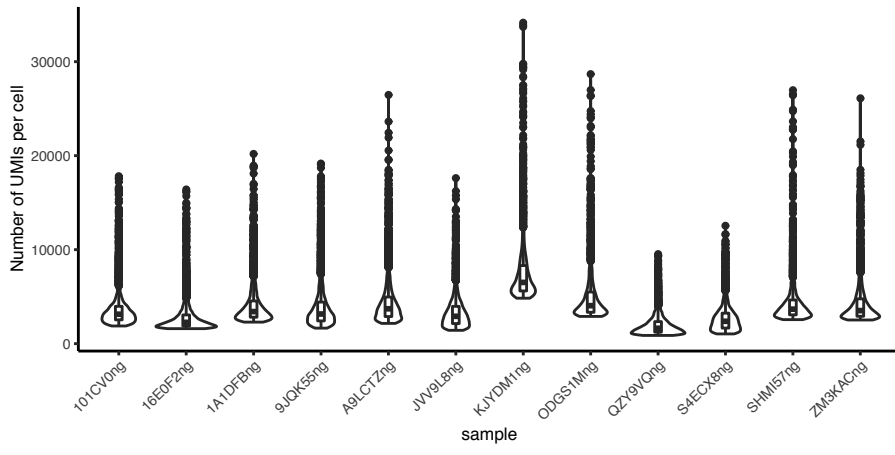

B

## HBECs Appendix Fig. S3

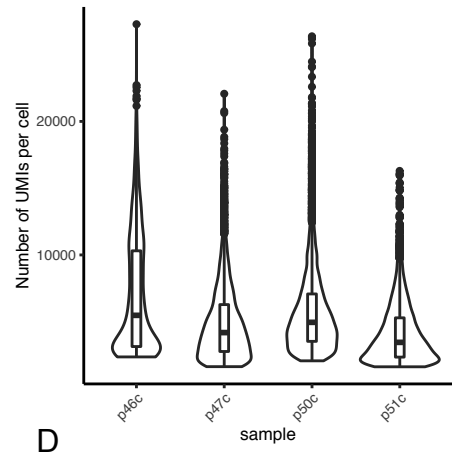

C

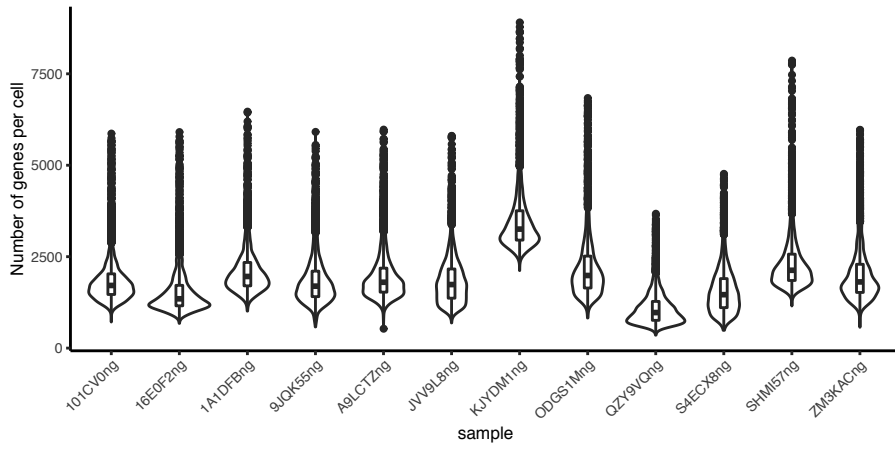

D

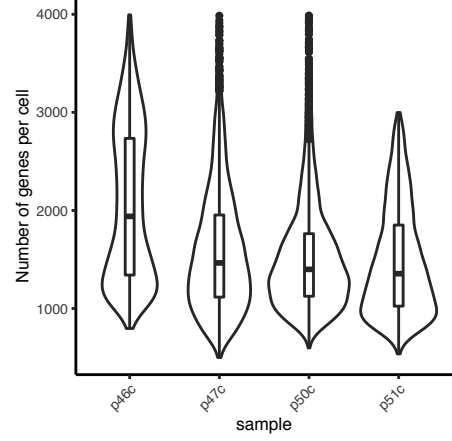

E

## percent mitochondrial reads

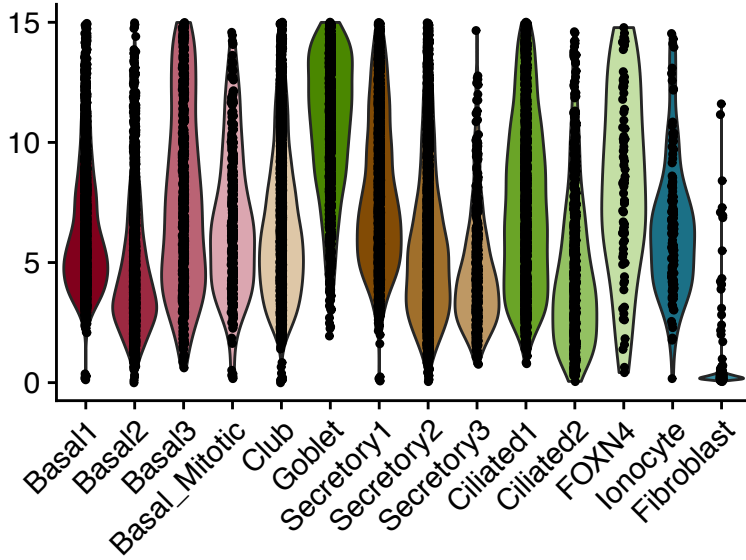

A

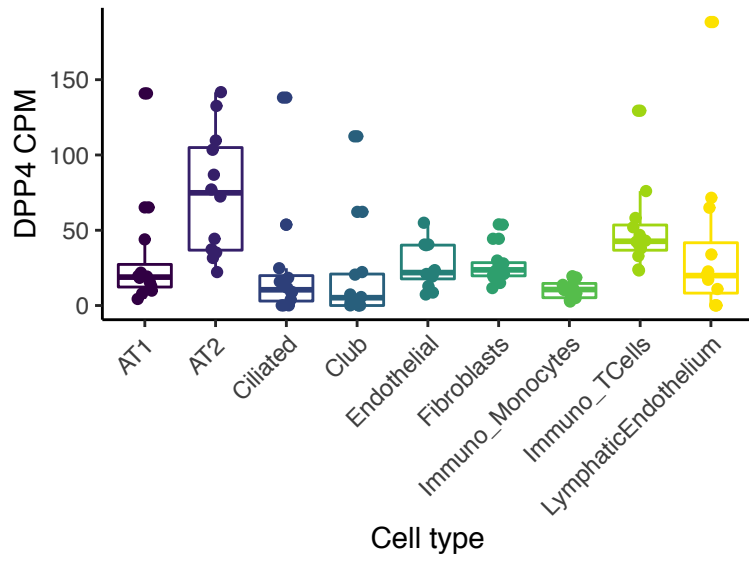lung  
B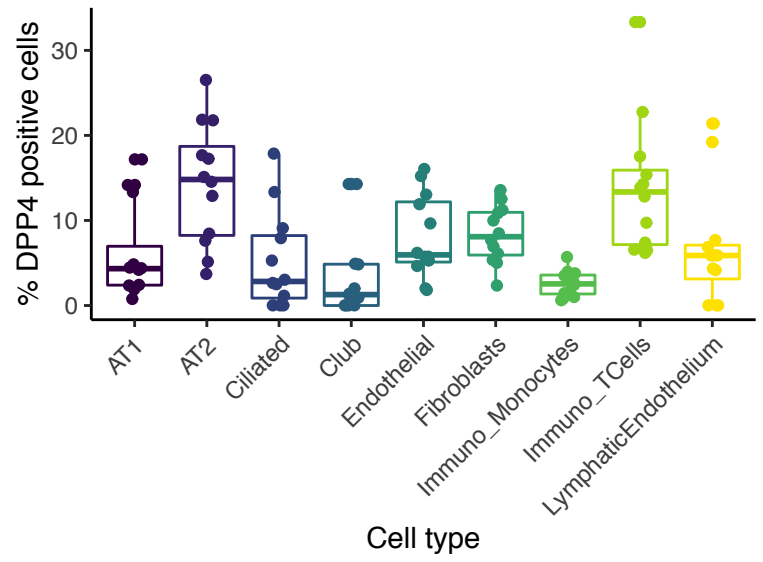

Supplement: EMBJ-39-e105114-s001.pdf [file EMBJ-39-e105114-s001.pdf]
