# Supplementary material for: SARS‐CoV‐2 receptor ACE2 and TMPRSS2 are primarily expressed in bronchial transient secretory cells
Source: PubMed Central journal article supplement (PMC7232010; doi:10.15252/embj.20105114), 2020-04-14
Supplement: EMBJ-39-e105114-s002.pdf [file EMBJ-39-e105114-s002.pdf]

# Expanded View Figures

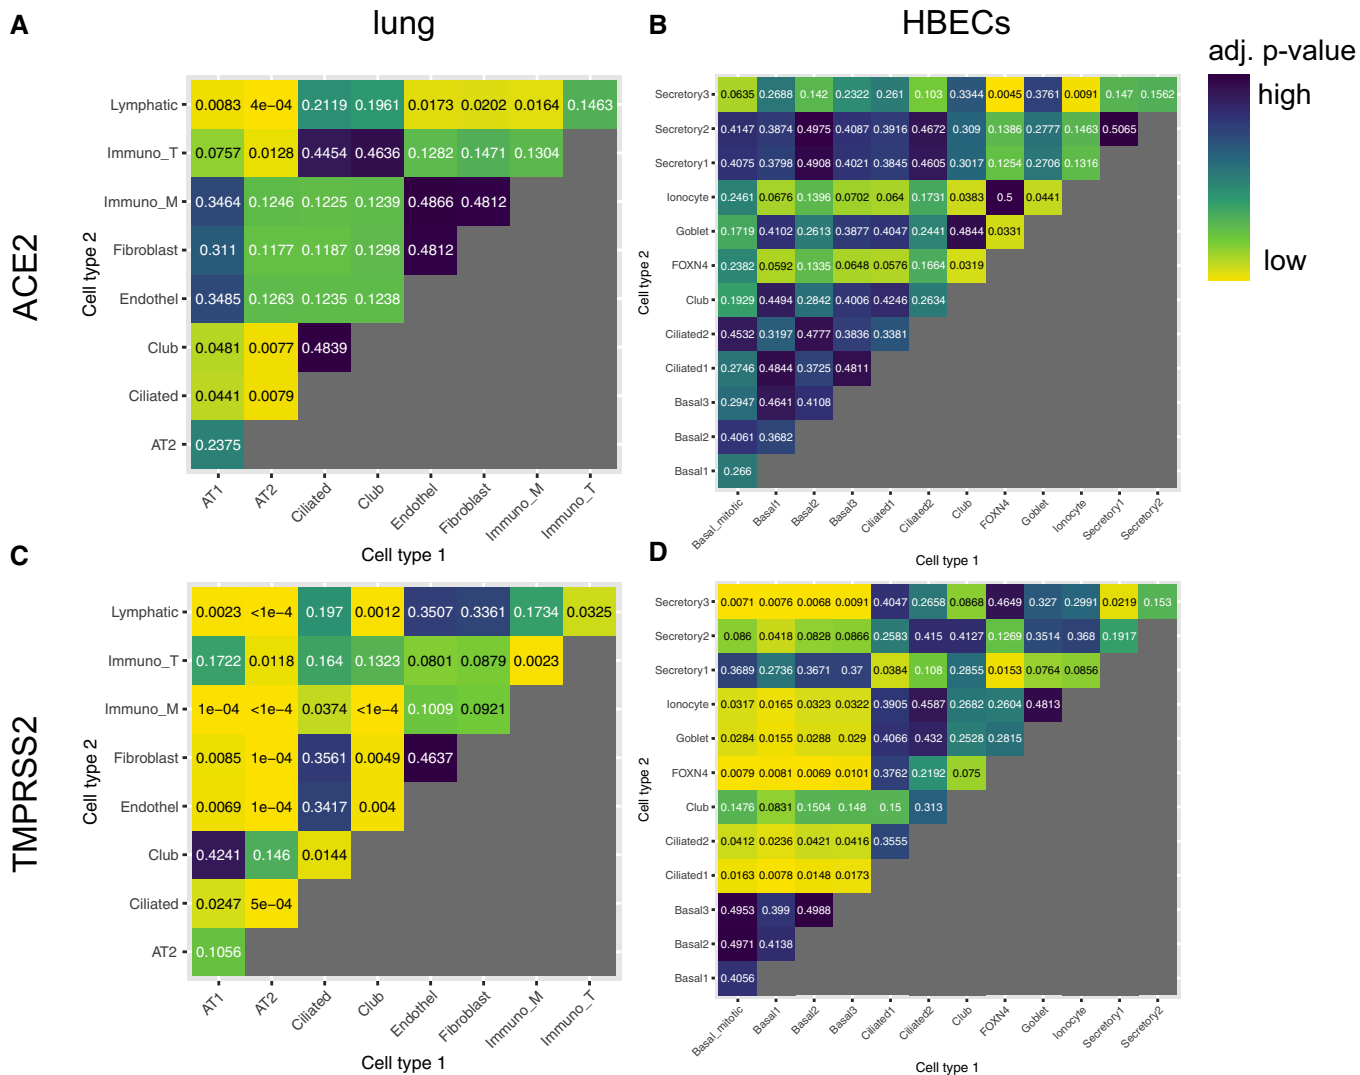

**Figure EV1. Statistical analysis of ACE2 and TMPRSS2 expression differences.**

A–D Heatmaps indicating the *P*-values of comparisons of expression levels between different cell types in the lung (A, C) and HBECS (B, D).

Data information: Values are obtained from Dunn's *post hoc* test followed by Benjamini–Hochberg correction for multiple testing.

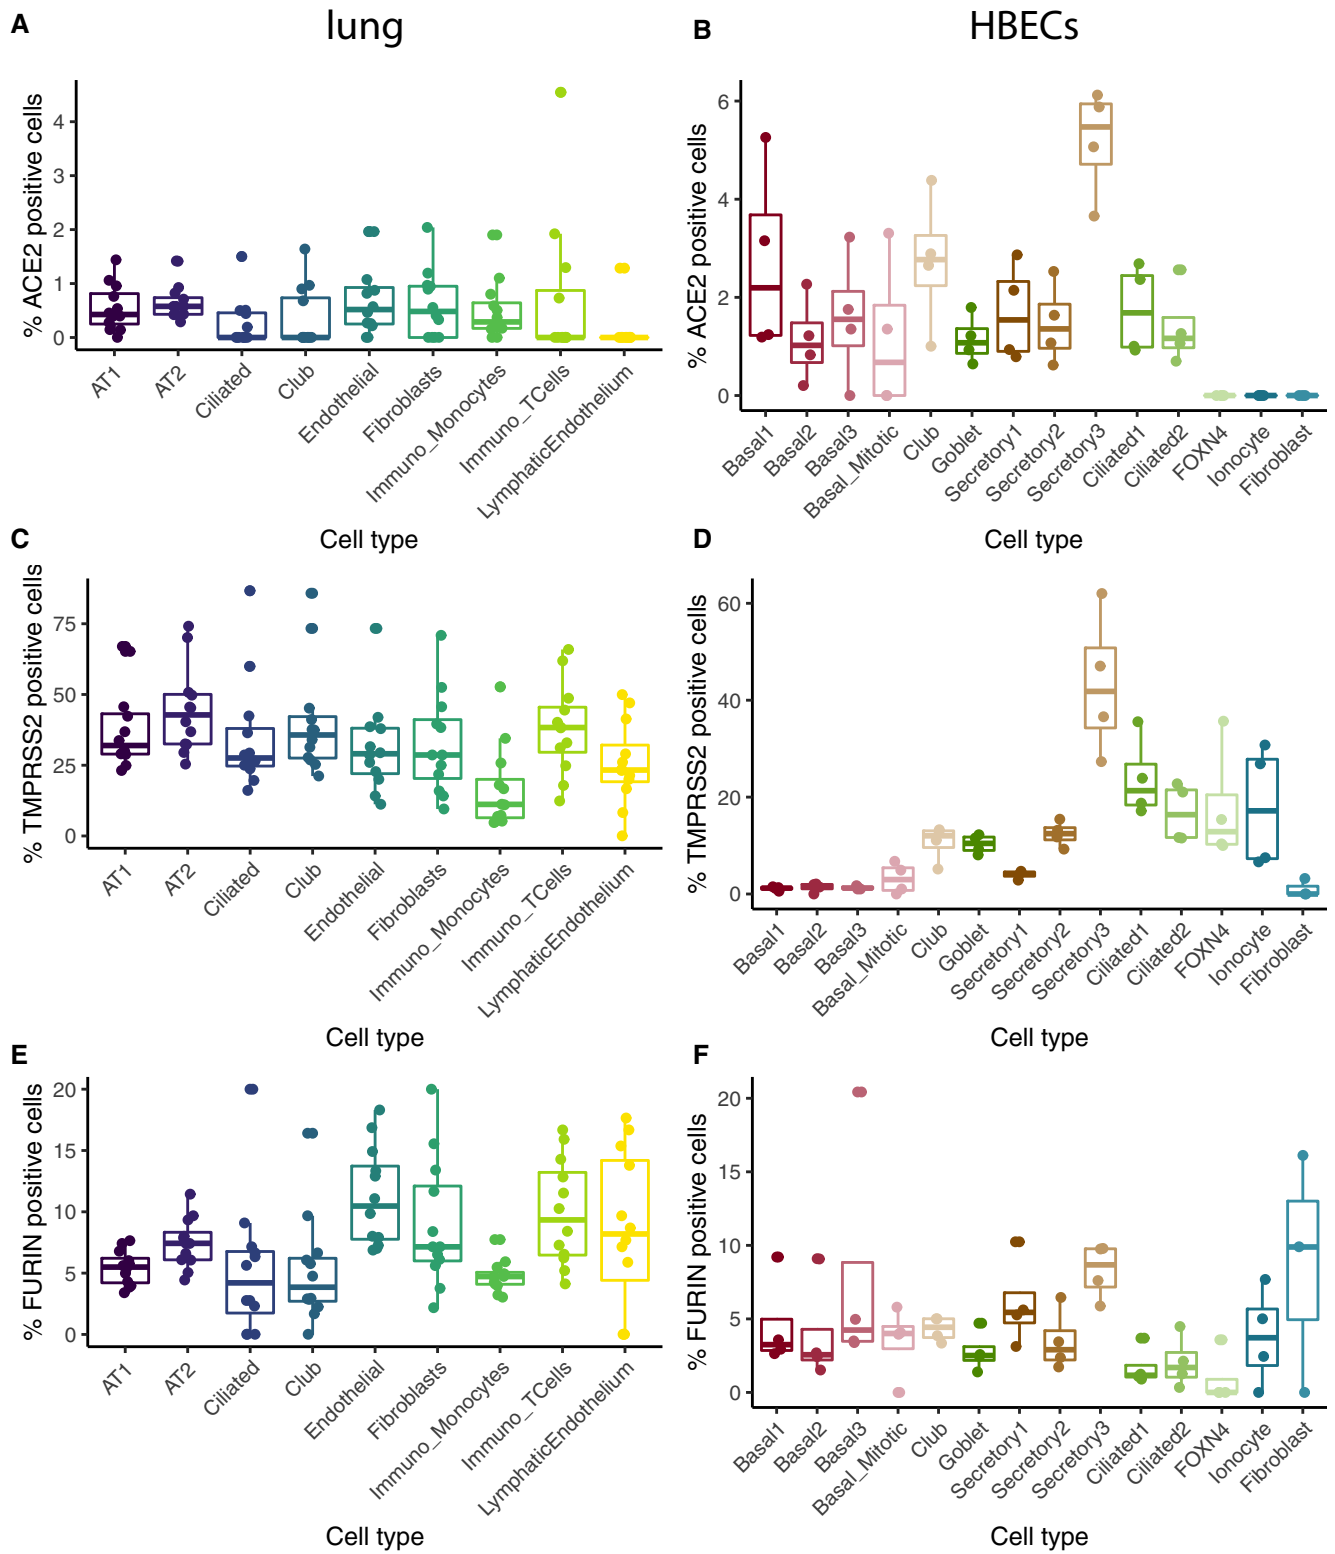

**Figure EV2. Percentage of ACE2-, TMPRSS2-, and FURIN-positive cells.**

A, B Percentage of positive cells (defined here as having at least one read of the respective gene) for ACE2 in the lung (A) and HBECS (B).  
 C, D Percentage of positive cells (defined here as having at least one read of the respective gene) for TMPRSS2 in the lung (C) and HBECS (D).  
 E, F Percentage of positive cells (defined here as having at least one read of the respective gene) for FURIN in the lung (E) and HBECS (F).

**Figure EV3. Expression levels of ACE2, TMPRSS2, and FURIN.**

- A–C ACE2- (A), TMPRSS2- (B), and FURIN- (C) expressing cells in the lung plotted on top of the UMAP coordinates. Expression levels are color-coded.
- D–F Dot plot indicating expression of ACE2 (D), TMPRSS2 (E), and FURIN (F) across different cell types in the lung. Percentage of expressing cells is size-coded; mean expression levels are color-coded.
- G–I ACE2- (G), TMPRSS2- (H), and FURIN- (I) expressing HBECs plotted on top of the UMAP coordinates. Expression levels are color-coded.
- J–L Dot plot indicating expression of ACE2 (J), TMPRSS2 (K), and FURIN (L) across different cell types in the bronchial epithelium. Percentage of expressing cells is size-coded; mean expression levels are color-coded.

lung

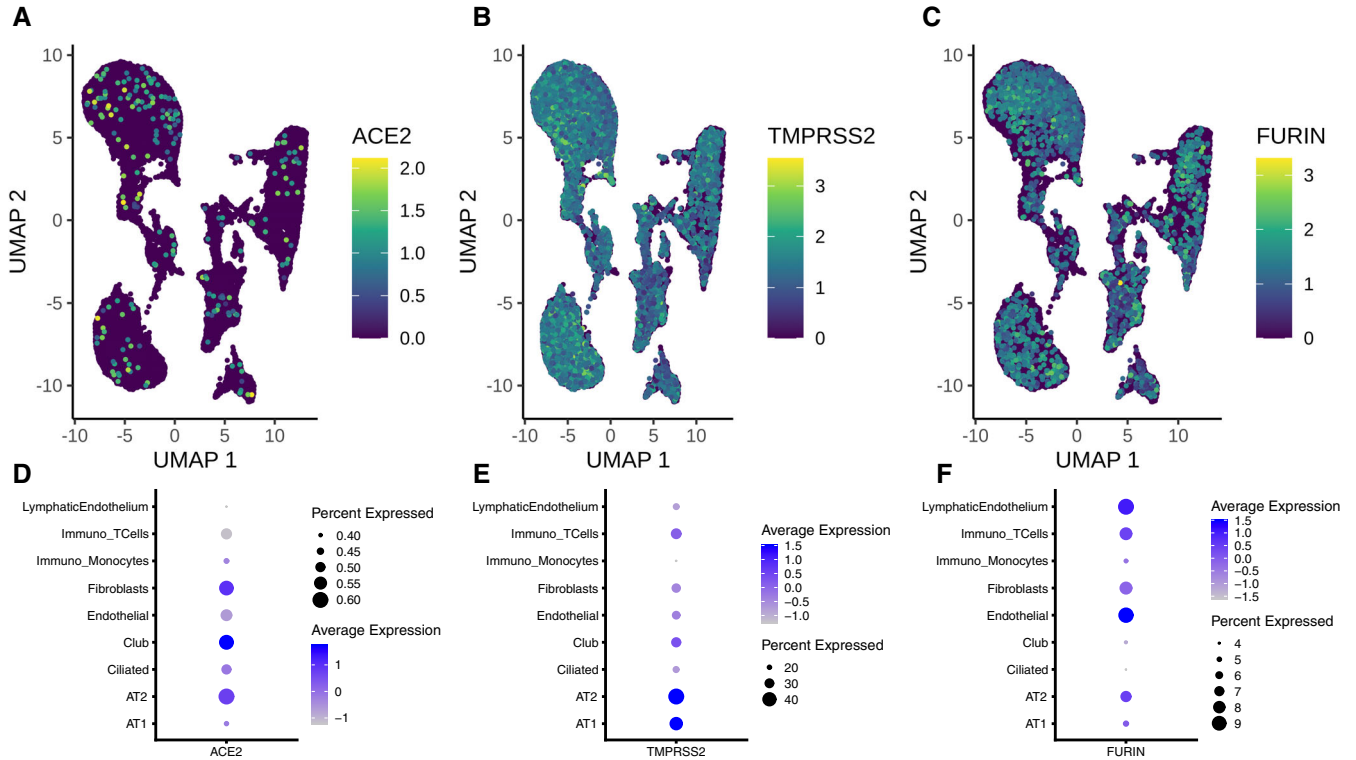

HBECS

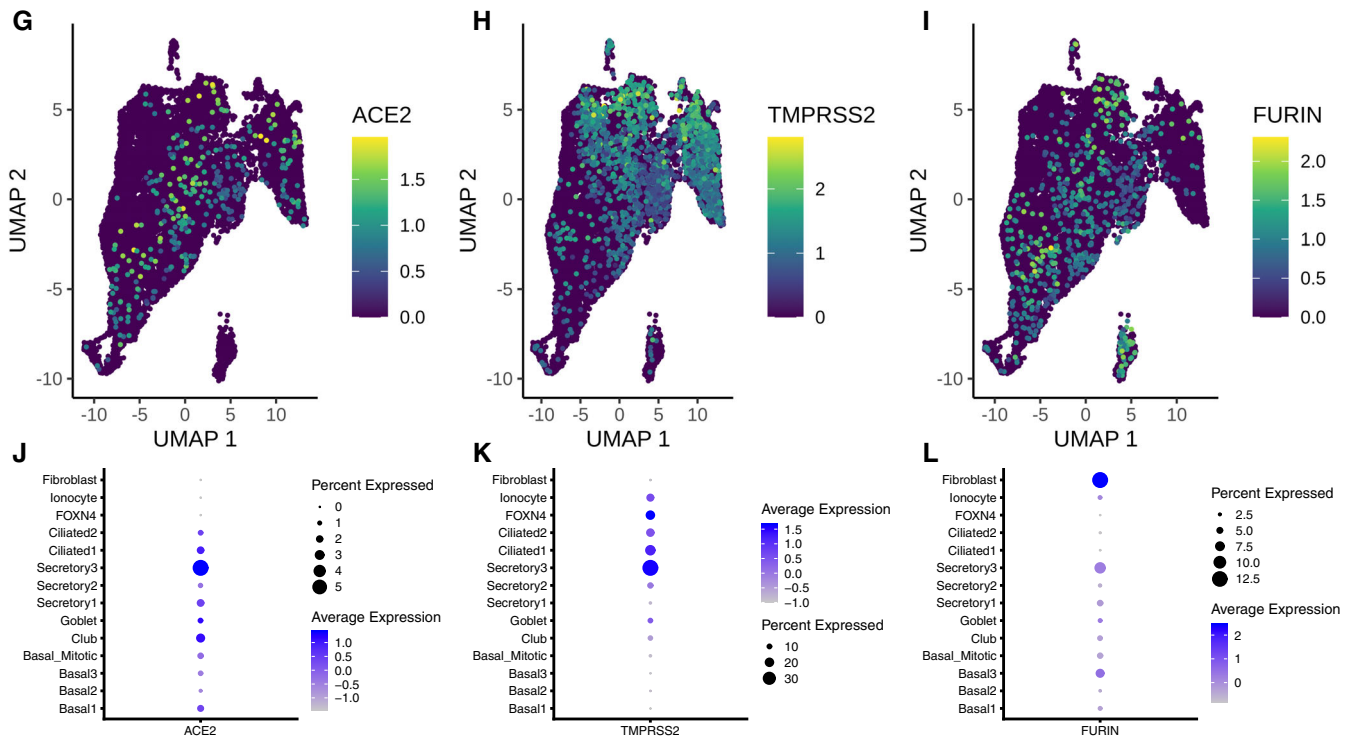

Figure EV3.

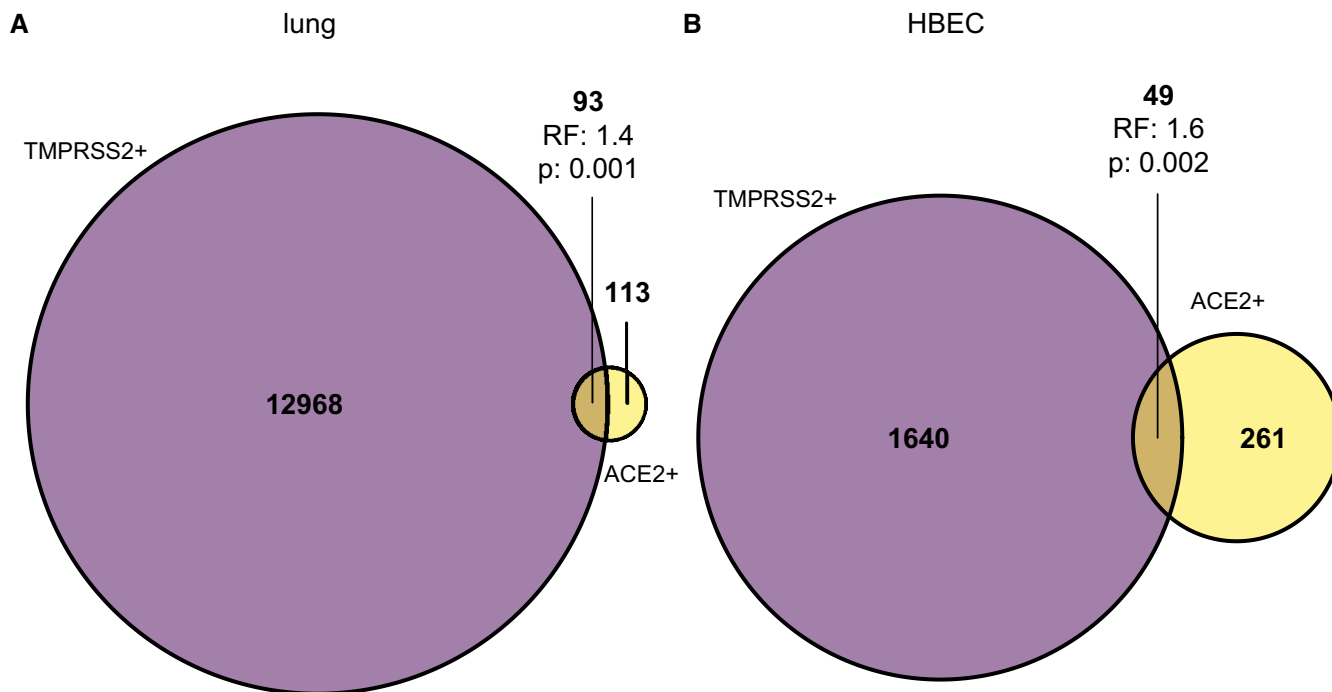

**Figure EV4. Quantification of ACE2<sup>+</sup>/TMPRSS2<sup>+</sup> double-positive cells.**

A, B Overlaps and enrichment statistics for all ACE2 and TMPRSS2 single- and double-positive cells in the lung (A) and HBEC (B) dataset.

Data information: RF: representation factor, enrichment. P: hypergeometric tail probability.

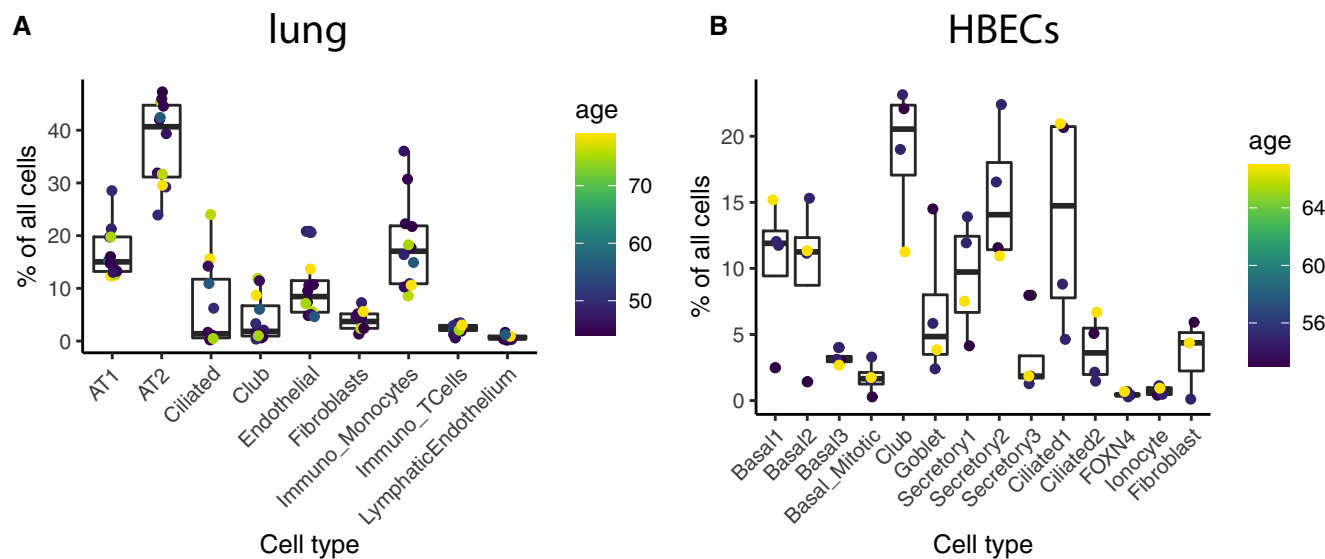

**Figure EV5. Age-dependent cell type composition.**

A, B Cell type composition in the lung (A) and HBEC (B) dataset. Age is color-coded.
